# Supplementary material for: Ultracompact on-chip coiled waveguide-integrated photodetectors enabled by 2D materials with enhanced responsivity
Source: Royal Society of Chemistry journal article supplement (doi:10.1039/d5nr04427h), 2025-12-24
Supplement: d5nr04427h1.pdf [file d5nr04427h1.pdf]

## Supplementary Information

# Ultracompact On-chip Coiled Waveguide-Integrated Photodetectors Enabled by 2D materials with Enhanced Responsivity

Maaz Ahmed Qureshi,<sup>\*a‡</sup> Fooqia Khalid,<sup>b‡</sup> Janvit Tippinit,<sup>a</sup> Faisal Ahmed,<sup>b</sup> Md Gius Uddin,<sup>b</sup> Abde Mayeen Shafi,<sup>b</sup> Xiaoqi Cui,<sup>b</sup> Matthieu Roussey,<sup>a</sup> Harri Lipsanen,<sup>b</sup> Zhipei Sun,<sup>b</sup> and Markku Kuittinen<sup>a</sup>

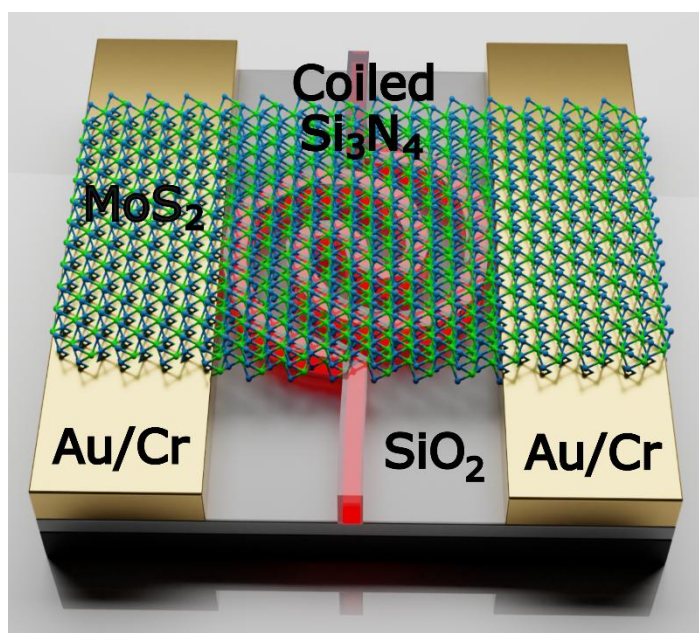

<sup>a</sup> Center for Photonics, University of Eastern Finland, Joensuu, Finland.  
Email: [maaz.qureshi@uef.fi](mailto:maaz.qureshi@uef.fi), [markku.kuittinen@uef.fi](mailto:markku.kuittinen@uef.fi)

<sup>b</sup> Department of Electronics and Nanoengineering, Aalto University, Espoo FI-02150, Finland.  
Email: [faisal.ahmed@aalto.fi](mailto:faisal.ahmed@aalto.fi), [zhipei.sun@aalto.fi](mailto:zhipei.sun@aalto.fi)

\* Corresponding author

‡ Contributed equally

## Table of Contents

Figure:

S1: Thickness dependence of MoS<sub>2</sub> on optical mode profile, transmittance, absorption.

S2: Raman characterization of MoS<sub>2</sub> flake.

S3: AFM of MoS<sub>2</sub> flakes transferred on the waveguides.

S4: Waveguide characterization setup and transmission loss measurements of silicon-nitride waveguides.

S5: Photocurrent generated by a MoS<sub>2</sub> on a straight waveguide and a MoS<sub>2</sub> on a coiled waveguide structure.

S6: Dark current of MoS<sub>2</sub> flakes on a straight and coiled waveguide structures.

S7: Gate voltage curve of MoS<sub>2</sub> flakes on a coiled waveguide structure.

S8: Simulated mode profile of a single layer MoS<sub>2</sub> film, transmittance, absorption and top-view field evolution in a Si<sub>3</sub>N<sub>4</sub> waveguide with an overlaid MoS<sub>2</sub> layer of varying interaction length.

S9: Simulated optical absorptance in MoS<sub>2</sub> on a straight and coiled waveguides.

S10: Benchmark comparison of our waveguide-integrated coiled MoS<sub>2</sub>-based photodetectors with previous photodetectors made with similar 2D materials.

**S1: Thickness dependence of MoS<sub>2</sub> on optical mode profile, transmittance, absorption.**

**Fig. S1a: Effect of MoS<sub>2</sub> thickness on optical mode confinement in the waveguide-integrated structure.**

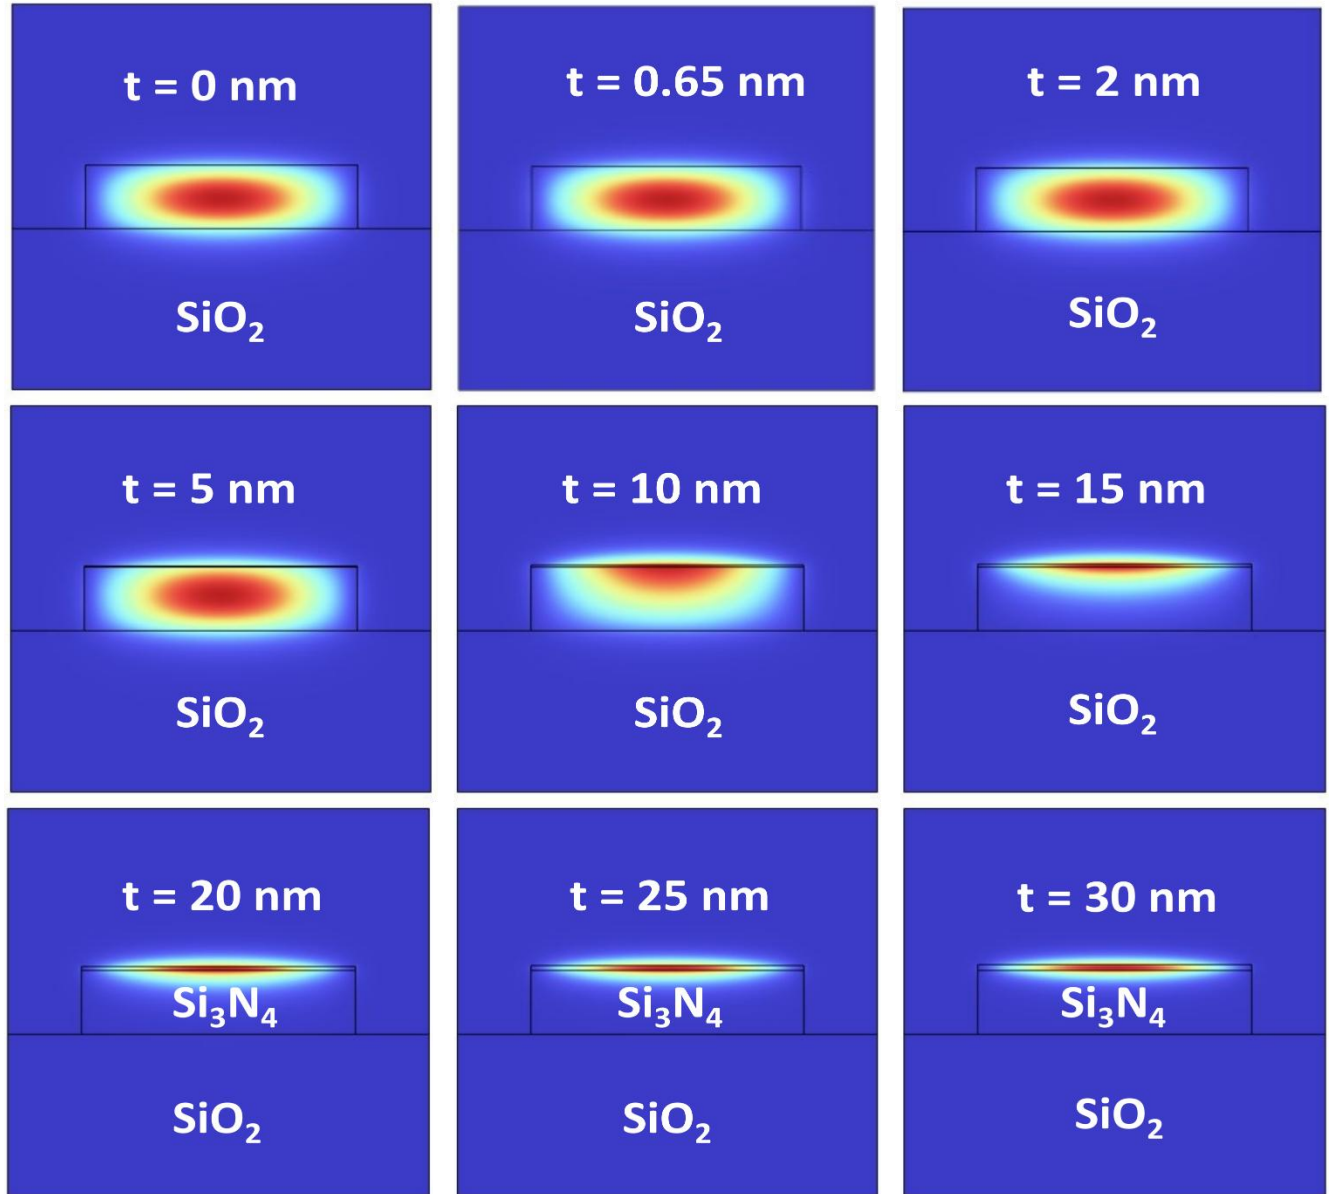

**Figure S1a: Simulated optical mode profiles in a Si<sub>3</sub>N<sub>4</sub> waveguide with varying MoS<sub>2</sub> film thicknesses from 0 to 30 nm. As the MoS<sub>2</sub> thickness increases, the optical mode gradually shifts upward and becomes more confined in the MoS<sub>2</sub> layer due to its higher refractive index. This enhanced light confinement in thicker MoS<sub>2</sub> layers leads to increased absorption, which directly influences photocurrent generation and responsivity. The simulations clearly visualize the evolution of mode distribution as a function of MoS<sub>2</sub> film thickness.**

**Fig. S1b: Simulated confinement and optical loss versus MoS<sub>2</sub> thickness on a Si<sub>3</sub>N<sub>4</sub> waveguide.**

| Thickness of MoS <sub>2</sub> film<br>(t [nm]) | Confinement Factor (%)                   |                       | Attenuation constant<br>(dB/μm) |
|------------------------------------------------|------------------------------------------|-----------------------|---------------------------------|
|                                                | Si <sub>3</sub> N <sub>4</sub> waveguide | MoS <sub>2</sub> film |                                 |
| 0                                              | 100                                      | 0                     | 0.05                            |
| 5                                              | 93.75                                    | 0.71                  | 0.96                            |
| 10                                             | 82.84                                    | 5.32                  | 6.44                            |
| 15                                             | 61.47                                    | 17.39                 | 23.50                           |
| 20                                             | 47.15                                    | 29.92                 | 36.28                           |
| 25                                             | 37.58                                    | 41.10                 | 45.33                           |
| 30                                             | 30.51                                    | 50.69                 | 51.71                           |

**Figure S1b: Simulated optical confinement factors and attenuation constant as a function of MoS<sub>2</sub> film thickness integrated on a Si<sub>3</sub>N<sub>4</sub> waveguide.** As the MoS<sub>2</sub> thickness increases from 0 to 30 nm, the optical mode increasingly shifts from the waveguide core to the MoS<sub>2</sub> layer, resulting in a significant rise in the confinement factor within MoS<sub>2</sub> and a corresponding increase in optical attenuation (from 0.05 to 51.71 dB/μm).

**Fig. S1c: Simulated confinement factors and optical loss versus MoS<sub>2</sub> thickness on a Si<sub>3</sub>N<sub>4</sub> waveguide.**

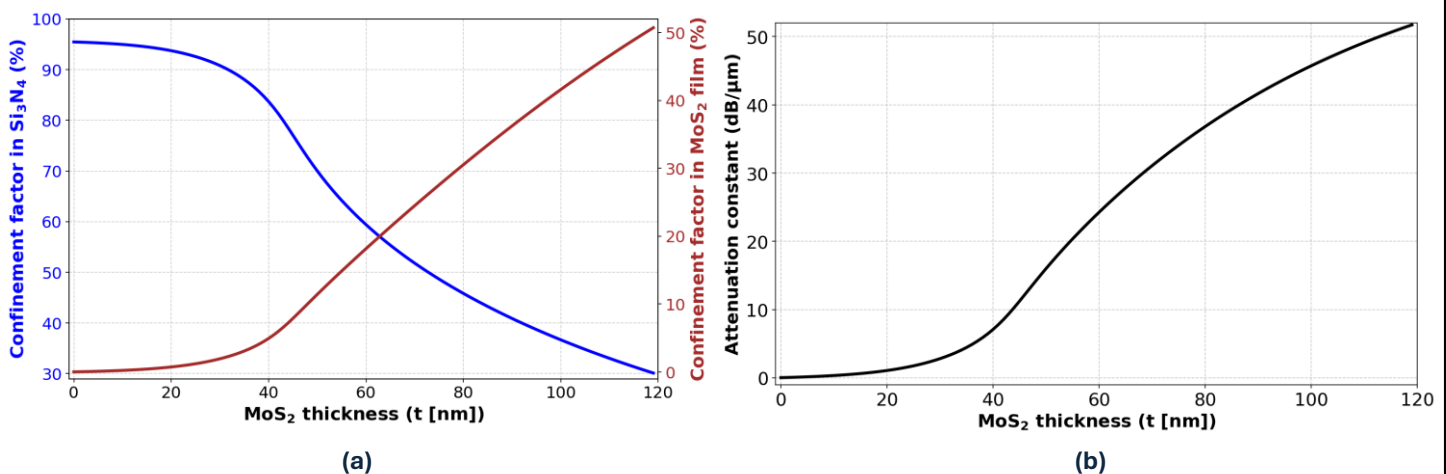

**Figure S1c:** As tabulated in Fig. S5b, the graphs in (a) shows the simulated confinement factors in the Si<sub>3</sub>N<sub>4</sub> waveguide core and MoS<sub>2</sub> film as a function of MoS<sub>2</sub> film thickness (b) shows the corresponding increase in attenuation constant (dB/μm), indicating light absorption in thicker MoS<sub>2</sub> layers.

### S2: Raman characterization of MoS<sub>2</sub> flake.

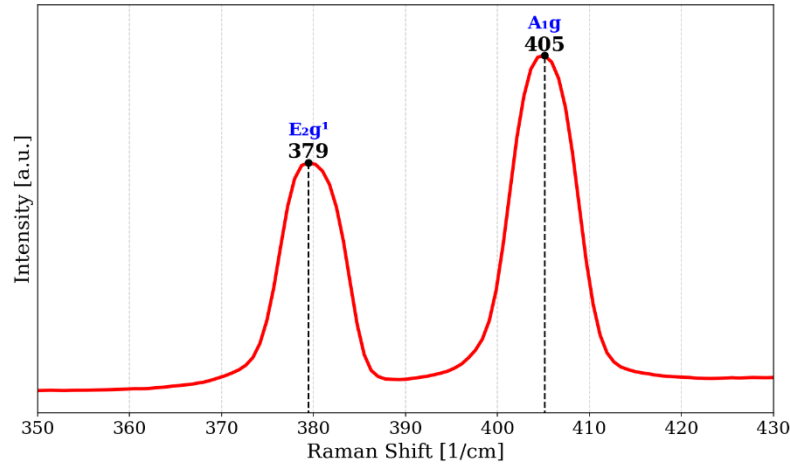

**Fig. S2: Raman response of MoS<sub>2</sub> flake transferred onto a Si<sub>3</sub>N<sub>4</sub> waveguide:** The two distinct peaks at  $\sim 379\text{ cm}^{-1}$  and  $\sim 405\text{ cm}^{-1}$  correspond to the E<sub>2</sub>g' (in-plane vibrational mode) and A<sub>1</sub>g (out-of-plane vibrational mode) of the MoS<sub>2</sub> flake, respectively. The vertical black dashed lines mark the peak positions for clarity, and the peak separation ( $\sim 26\text{ cm}^{-1}$ ) indicates a multilayer MoS<sub>2</sub>.

### S3: AFM of MoS<sub>2</sub> flakes transferred on the waveguides.

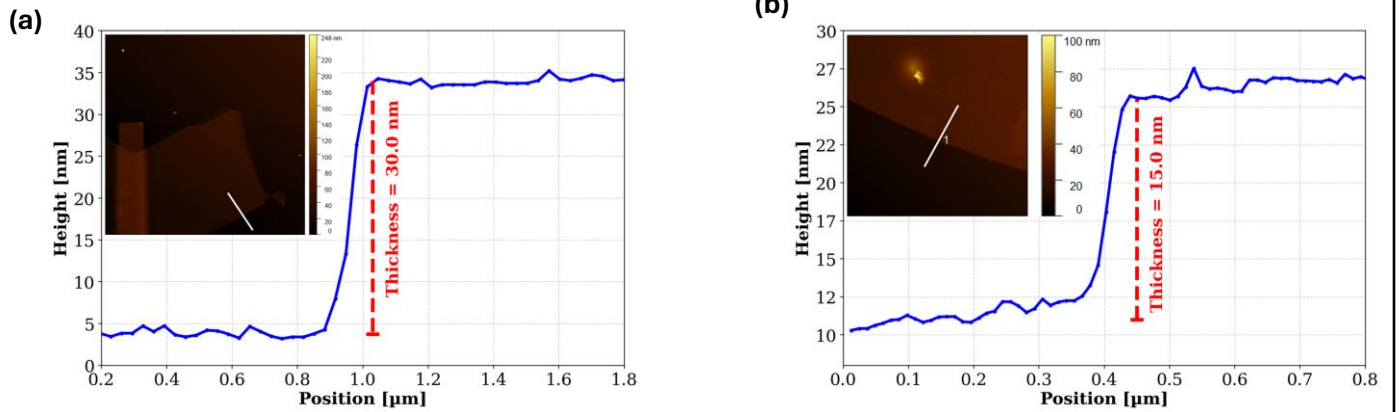

**Fig. S3: Atomic Force Microscopy (AFM) height profiles of MoS<sub>2</sub> flakes in different structural configurations.** (a) shows the MoS<sub>2</sub> flake on a straight waveguide with a measured thickness of 30 nm, while (b) shows the MoS<sub>2</sub> flake on a coiled waveguide structure with a thickness of 15 nm. The lateral axis corresponds to the white line drawn across the flakes in the insets. The measurements confirm the multilayer nature of the flakes used in the electro-optical characterization.

#### S4: Waveguide characterization setup and transmission loss measurements of silicon-nitride waveguides.

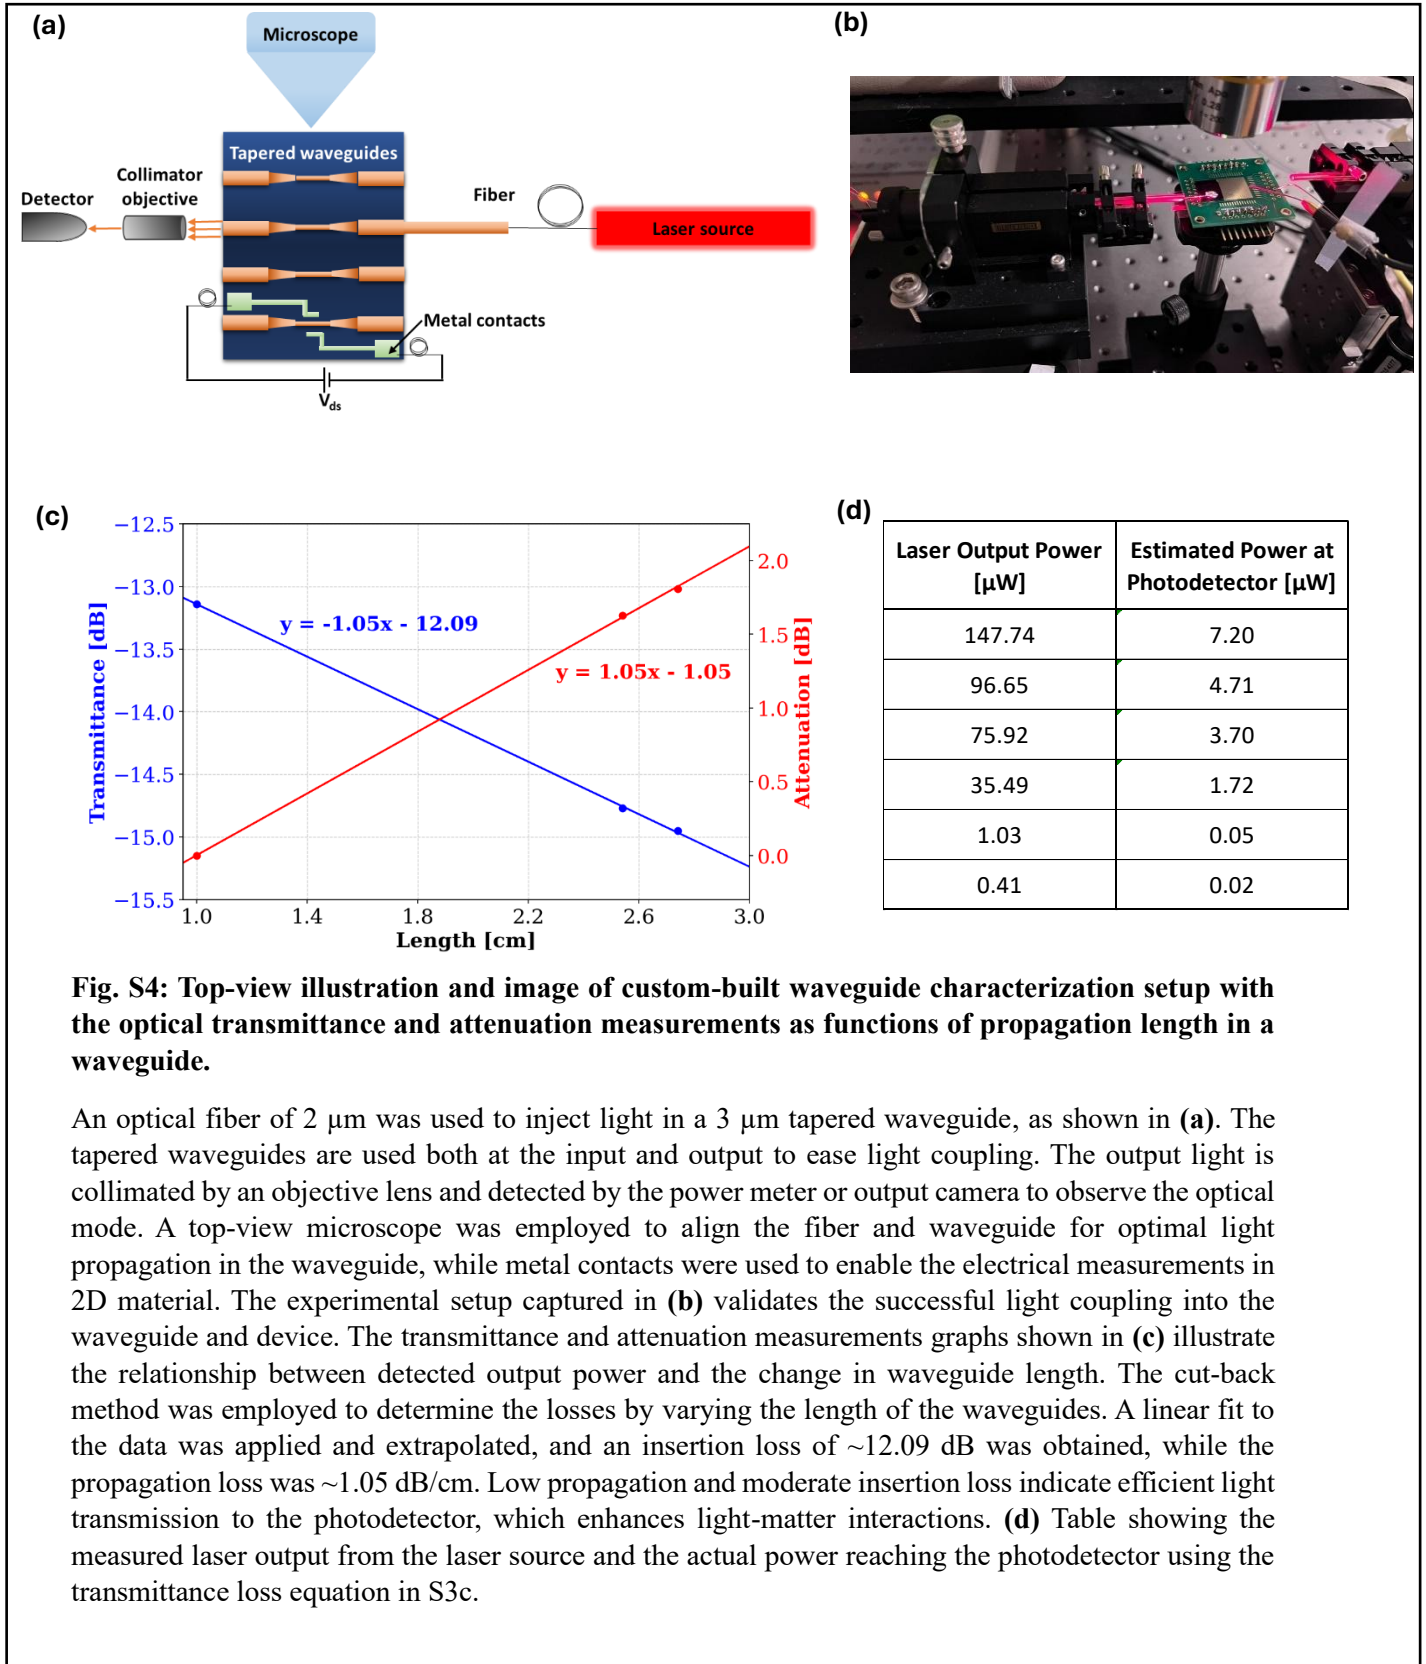

**S5: Photocurrent generated by a MoS<sub>2</sub> on a straight waveguide and a MoS<sub>2</sub> on a coiled waveguide structure.**

**(a) MoS<sub>2</sub> on a straight waveguide in a laterally incident light coupling in a waveguide**

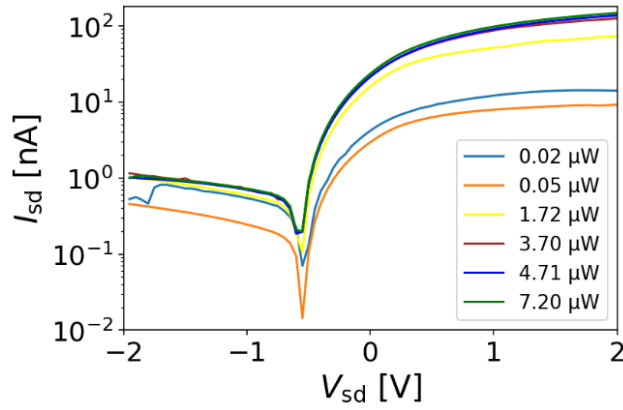

**(b) MoS<sub>2</sub> on a coiled waveguide in a laterally incident light coupling in a waveguide**

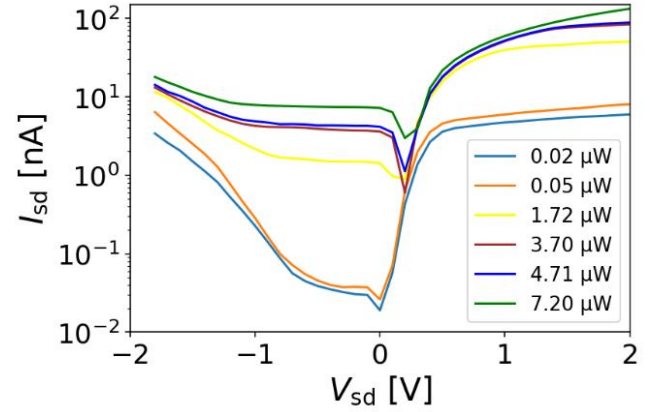

**Figure S5: Photocurrent generated in MoS<sub>2</sub> integrated on (a) a straight waveguide and (b) a coiled waveguide under lateral light coupling at varying optical powers.** The photocurrent increases with optical power in both configurations, with a steeper slope in the coiled waveguide structure. The light propagates through the waveguide and generates an electric field perpendicular to the waveguide plane, enabling light-matter interaction with MoS<sub>2</sub>.

**S6: Dark current of MoS<sub>2</sub> flakes on a straight and coiled waveguide structures.**

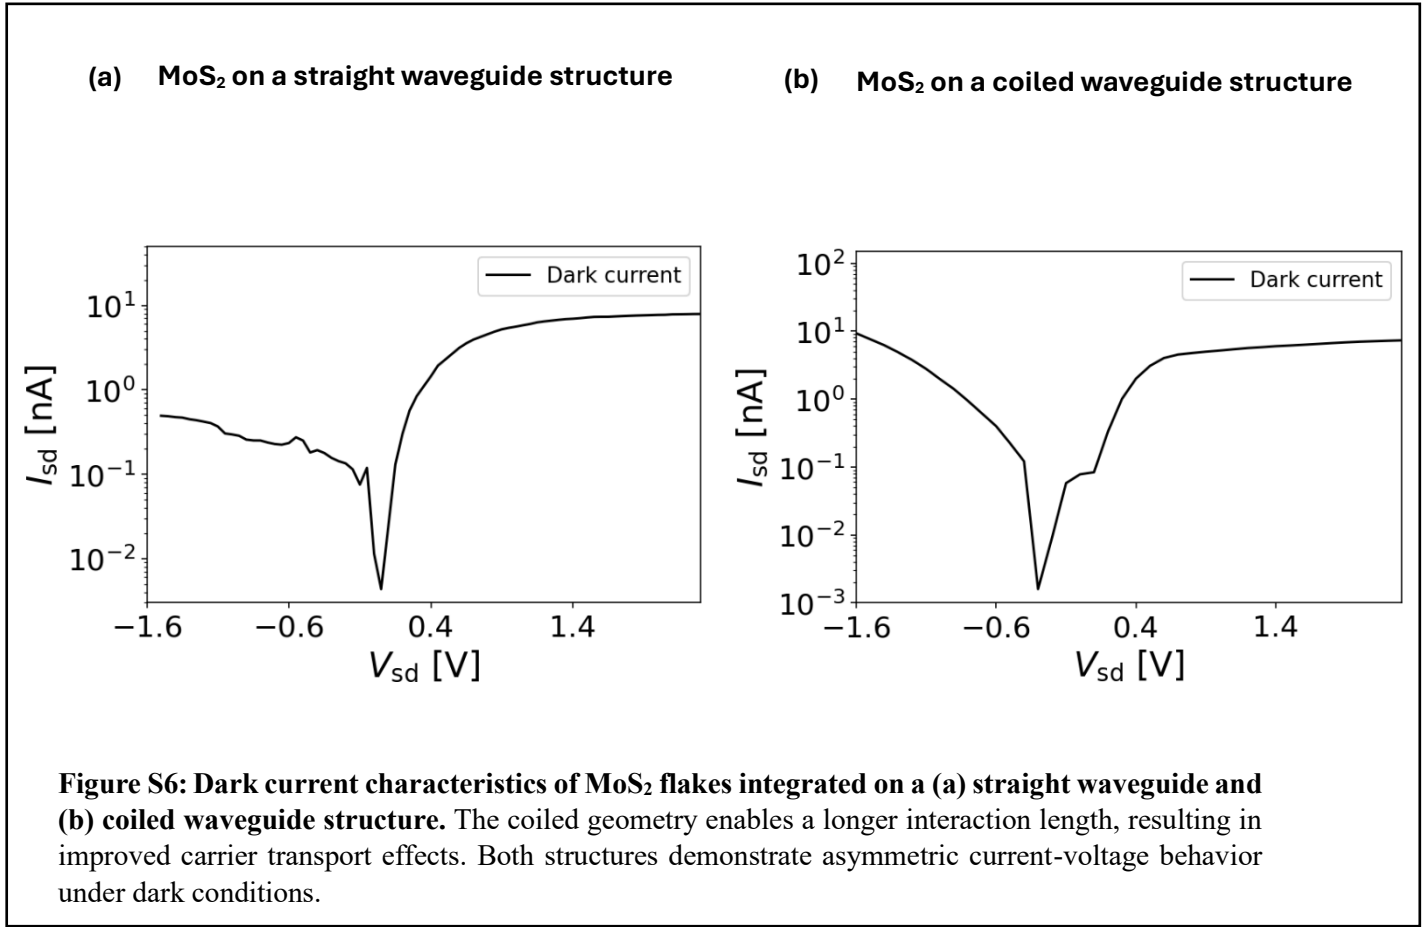

**S7: Gate voltage curve of MoS<sub>2</sub> flakes on a coiled waveguide structure.**

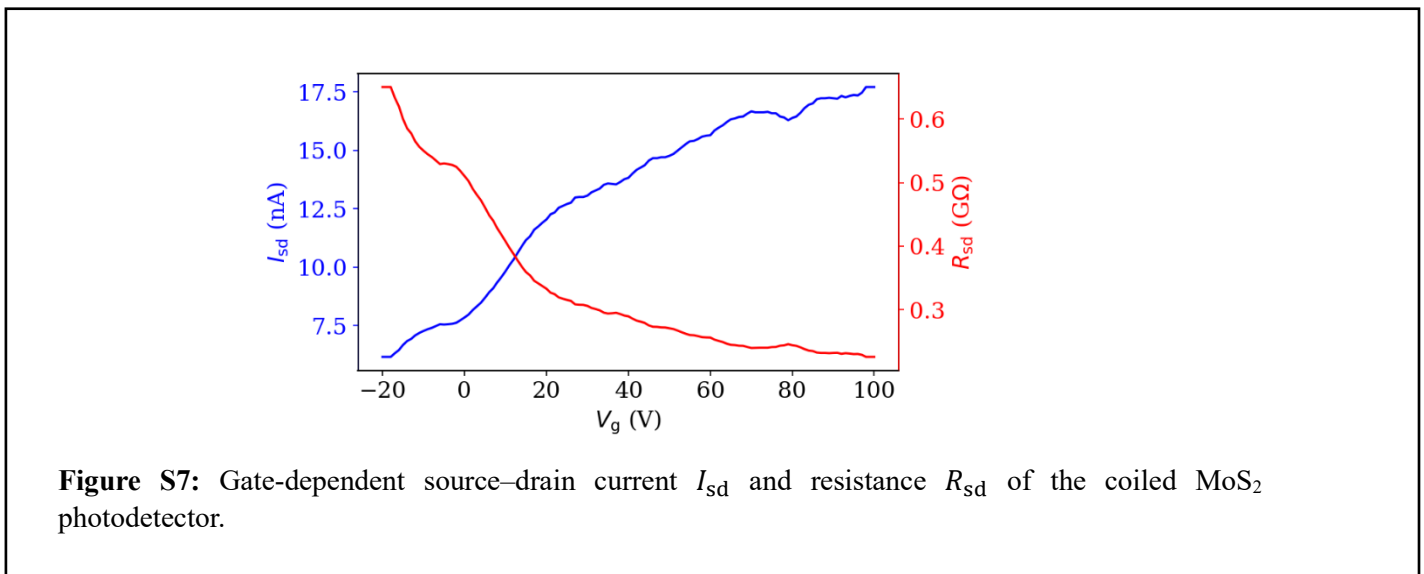



**Fig. S8: Simulated mode profile of a single layer MoS<sub>2</sub> film, transmittance, absorption and top-view field evolution in a Si<sub>3</sub>N<sub>4</sub> waveguide with an overlaid MoS<sub>2</sub> layer of varying interaction length.**

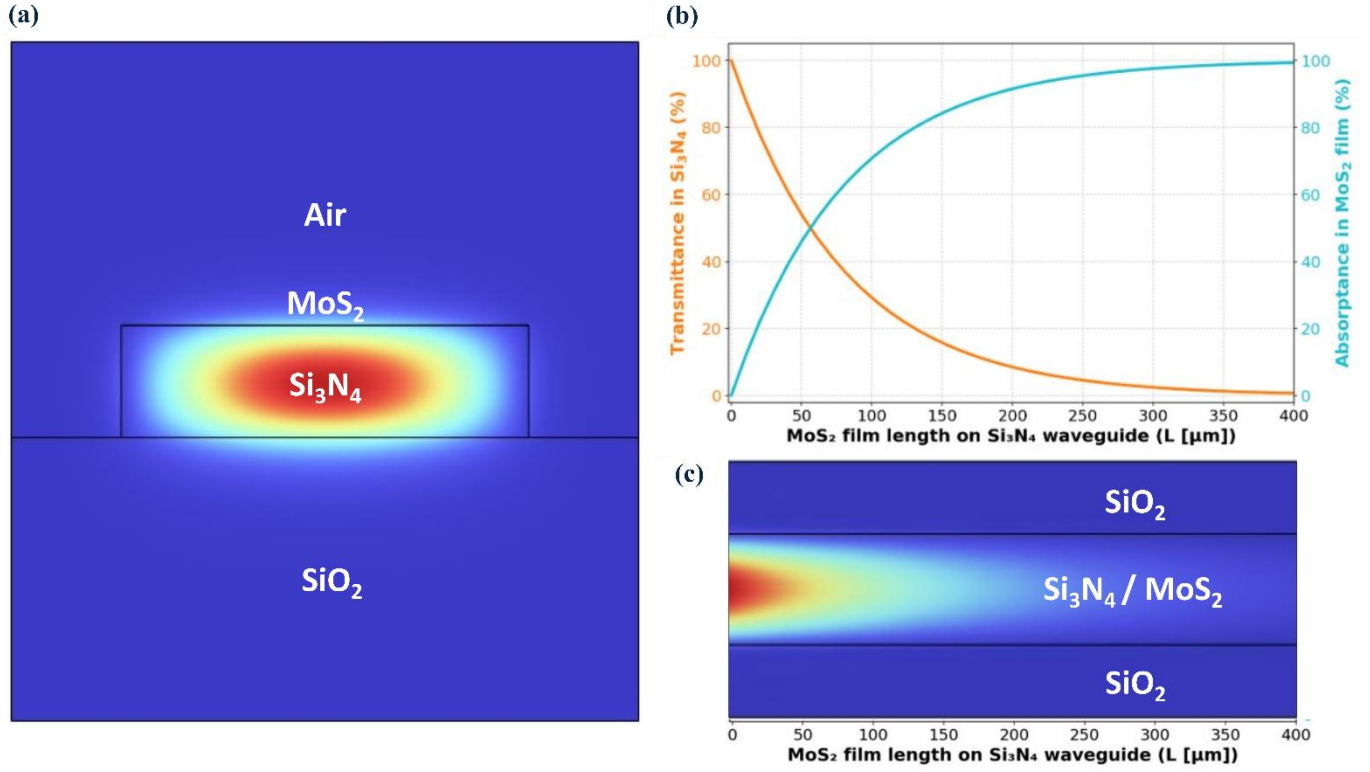

**Figure S8:** (a) Simulated optical mode profile of a Si<sub>3</sub>N<sub>4</sub> waveguide covered with a monolayer (0.65 nm) MoS<sub>2</sub> film, showing evanescent coupling into the 2D material. (b) Variation of transmittance and absorbance as the interaction length increases up to 400 nm, highlighting that a substantial length is required for significant absorption when using a single MoS<sub>2</sub> layer. (c) Top-view simulation illustrating the gradual attenuation of the optical mode along the waveguide due to interaction with the monolayer MoS<sub>2</sub>. These results highlight the critical role of extending the light-matter interaction length, achievable through compact coiled waveguide designs, in boosting optical absorption and responsivity when utilizing atomically thin 2D materials.

**Fig. S9: Simulated optical absorbance in MoS<sub>2</sub> on a straight and coiled waveguides.**

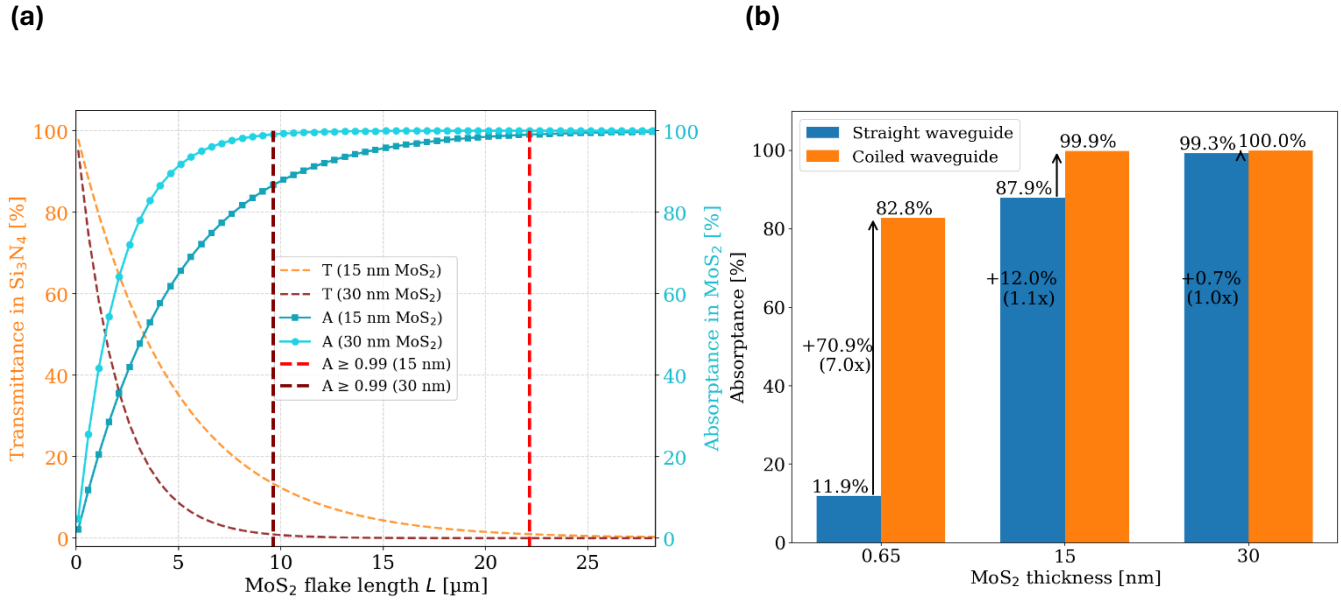

**Figure S9.** (a) Simulated transmittance and MoS<sub>2</sub> absorbance at 532 nm versus flake length for 15 nm and 30 nm films. (b) Total MoS<sub>2</sub> absorbance for straight and coiled waveguides at 0.65 nm, 15 nm and 30 nm thickness, highlighting the stronger absorption provided by the coiled geometry, especially for ultrathin MoS<sub>2</sub>.

**Fig. S10: Benchmark comparison of our waveguide-integrated coiled MoS<sub>2</sub>-based photodetectors with previous photodetectors made with similar 2D materials.**

| Device materials                              | Material thickness | Device architecture      | Incident Wavelength [nm] | V <sub>g</sub> / V <sub>sd</sub> | Responsivity [A/W] | Reference |
|-----------------------------------------------|--------------------|--------------------------|--------------------------|----------------------------------|--------------------|-----------|
| MoS <sub>2</sub>                              | 30 nm              | Waveguide-integrated     | 532                      | 2 V                              | 0.61               | This work |
| MoS <sub>2</sub>                              | 60 nm              | Waveguide-integrated     | 1550                     | 1 V                              | 1.05               | [1]       |
| MoS <sub>2</sub>                              | Not specified      | Non-waveguide-integrated | 1550                     | 2 V                              | 34                 | [2]       |
| MoS <sub>2</sub> /Au                          | 3 nm               | Waveguide-integrated     | 1550                     | 5 V                              | 0.3                | [3]       |
| MoS <sub>2</sub>                              | 0.65 nm            | Non-waveguide-integrated | 561                      | -70V/ 8V                         | 0.88               | [4]       |
| MoS <sub>2</sub>                              | 0.65 nm            | Waveguide-integrated     | 647                      | 0 V / 1 V                        | 1000               | [5]       |
| TaSe <sub>2</sub> -MoS <sub>2</sub> -graphene | 0.7 nm             | Non-waveguide-integrated | 532                      | 0 V / 0.2 V                      | 10                 | [6]       |
| Graphene- MoS <sub>2</sub>                    | 1 nm               | Waveguide-integrated     | 532                      | 30 V / 0 V                       | 0.44               | [7]       |
| Graphene-MoS <sub>2</sub> heterostructure     | 0.65 nm / 3 nm     | Waveguide-integrated     | 520                      | 1 V                              | 10 <sup>7</sup>    | [8]       |
| MoS <sub>2</sub> -InSe                        | 242 nm / 107 nm    | Waveguide-integrated     | 532                      | -60V/ 2V                         | 0.11               | [9]       |
| GQDs/InSe                                     | Not specified      | Non-waveguide-integrated | 635                      | Not specified                    | 27.48              | [10]      |
| MoTe <sub>2</sub> /graphene                   | Not specified      | Non-waveguide-integrated | 1310                     | Not specified                    | 0.567              | [11]      |
| MoSe <sub>2</sub> -WS <sub>2</sub>            | 20 nm / 1 nm       | Waveguide-integrated     | 780                      | 0 V / 2 V                        | 0.97               | [12]      |
| MoSe <sub>2</sub> -WS <sub>2</sub>            | 20 nm / 1 nm       | Waveguide-integrated     | 780                      | 0 V / 2 V                        | 0.97               | [13]      |
| BP-MoTe <sub>2</sub>                          | 13 nm/ 10.6 nm     | Waveguide-integrated     | 1503                     | 0 V / 0 V                        | 0.27               | [14]      |
| MoTe <sub>2</sub>                             | 60 nm              | Waveguide-integrated     | 1550                     | 0 V / -2 V                       | 0.50               | [15]      |
| Graphene                                      | 0.37 nm            | Waveguide-integrated     | 1550                     | 3.2 V / -0.3 V                   | 0.40               | [16]      |
| Black phosphorus                              | 40 nm              | Waveguide-integrated     | 2000                     | 0 V / 0.4 V                      | 0.31               | [17]      |

## References

- [1] F. Yang, Y. Hu, J. Ou, Q. Li, X. Xie, H. Han, C. Cai, S. Ruan, B. Xiang, *ACS Photonics*, DOI: 10.1021/acsphotonics.4c02618.
- [2] X. Liu, J. Zhu, Y. Shan, C. Liu, C. Pan, T. Zhang, C. Liu, T. Chen, J. Ling, J. Duan, F. Qiu, S. Rahman, H. Deng and N. Dai, *Advanced Science*, DOI:10.1002/advs.202408299.
- [3] C. Hong, S. Oh, V. K. Dat, S. Pak, S. N. Cha, K. H. Ko, G. M. Choi, T. Low, S. H. Oh and J. H. Kim, *Light Sci Appl*, DOI:10.1038/s41377-023-01308-x.
- [4] O. Lopez-Sanchez, D. Lembke, M. Kayci, A. Radenovic and A. Kis, *Nat Nanotechnol*, 2013, 8, 497–501.
- [5] J. F. Gonzalez Marin, D. Unuchek, K. Watanabe, T. Taniguchi and A. Kis, *NPJ 2D Mater Appl*, DOI:10.1038/s41699-019-0096-4.
- [6] M. Mahajan, S. Kallatt, M. Dandu, N. Sharma, S. Gupta and K. Majumdar, *Commun Phys*, DOI:10.1038/s42005-019-0190-0.
- [7] Z. Wu, T. Zhang, Y. Chen, Y. Zhang and S. Yu, *Physica Status Solidi - Rapid Research Letters*, 2019, 13.
- [8] W. Zhang, C. Chuu, J. Huang, C. Chen, M. Tsai, Y. Chang, C. Liang, Yu. Chen, Yu. Chueh, Jr. He, Mei. Chou, Lain, Li, *Scientific Reports*, DOI: 10.1038/srep03826.
- [9] X. Cui, M. Du, S. Das, H. H. Yoon, V. Y. Pelgrin, D. Li and Z. Sun, *Nanoscale*, DOI:10.1039/d2nr01042a.
- [10] S. R. Tamalampudi, J. E. Villegas, G. Dushaq, R. Sankar, B. Paredes and M. Rasras, *Adv Photonics Res*, DOI:10.1002/adpr.202300162.
- [11] C. Yang, Z. Liu, H. Cai, D. Li, Y. Yu, X. Zhang, *ACS Photonics*, DOI:10.1021/acsnano.4c14937.
- [12] R. Gherabli, S. R. K. C. Indukuri, R. Zektzer, C. Frydendahl and U. Levy, *Light Sci Appl*, DOI:10.1038/s41377-023-01088-4.
- [13] N. Flöry, P. Ma, Y. Salamin, A. Emboras, T. Taniguchi, K. Watanabe, J. Leuthold and L. Novotny, *Nat Nanotechnol*, 2020, 15, 118–124.
- [14] R. Tian, X. Gan, C. Li, X. Chen, S. Hu, L. Gu, D. Van Thourhout, A. Castellanos-Gomez, Z. Sun and J. Zhao, *Light Sci Appl*, DOI:10.1038/s41377-022-00784-x.
- [15] R. Maiti, C. Patil, M. A. S. R. Saadi, T. Xie, J. G. Azadani, B. Uluutku, R. Amin, A. F. Briggs, M. Miscuglio, D. Van Thourhout, S. D. Solares, T. Low, R. Agarwal, S. R. Bank and V. J. Sorger, *Nat Photonics*, 2020, 14, 578–584.
- [16] J. Guo, J. Li, C. Liu, Y. Yin, W. Wang, Z. Ni, Z. Fu, H. Yu, Y. Xu, *Light Sci Appl*, DOI:10.1038/s41377-020-0263-6.
- [17] Y. Yin, R. Cao, J. Guo, C. Liu, J. Li, X. Feng, H. Wang, W. Du, A. Qadir, H. Zhang, Y. Ma, S. Gao, Y. Xu, Y. Shi, L. Tong, D. Dai, *Laser & Photonics Reviews*, DOI: 10.1002/lpor.201900032.
